# Supplementary material
Source: Springer Nature journal article supplement (https://www.springermedizin.de/resource/supplementary/12943_2013_1219_MOESM9_ESM.pdf/9552420)

**A**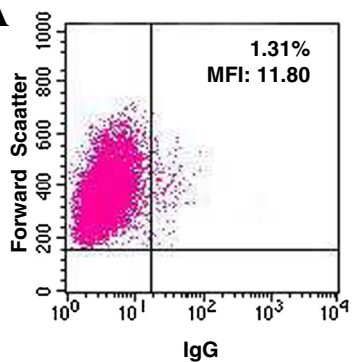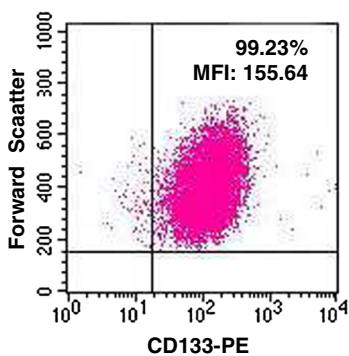**B**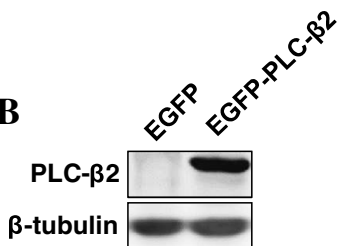**C**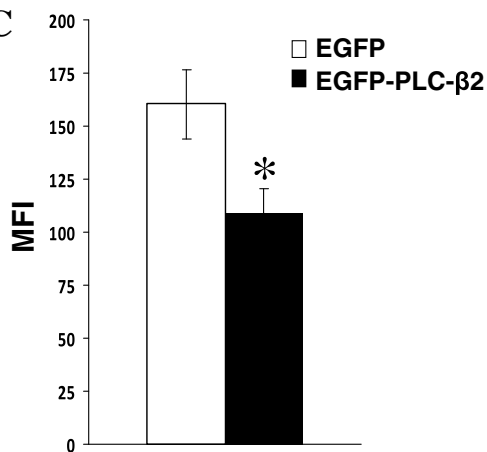**D**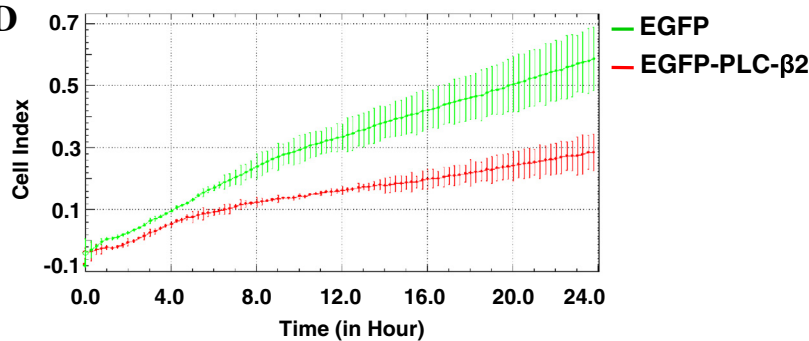

Supplement: MOESM9 [file 9552420]
